# Supplementary material for: Impact of diabetes self-management, diabetes management self-efficacy and diabetes knowledge on glycemic control in people with Type 2 Diabetes (T2D): A multi-center study in Thailand
Source: PubMed Central journal article supplement (PMC7774854; doi:10.1371/journal.pone.0244692), 2020-12-31
Supplement: pone.0244692.s002.pdf [file pone.0244692.s002.pdf]

## แบบสอบถาม

ID Code □□□□

**คำอธิบาย :** แบบสอบถามนี้ประกอบด้วยสองส่วน คือ ส่วนที่ 1 ข้อมูลส่วนบุคคลของผู้ตอบแบบสอบถาม ส่วนที่ 2 เป็นเครื่องมือสำหรับการประเมินการรับรู้ความสามารถตนเอง การจัดการตนเอง และความรู้ของผู้ป่วยเบาหวานชนิดที่ 2

กรุณาทำเครื่องหมาย ✓ ลงในช่อง  หรือเขียนคำตอบลงใน

.....

### ส่วนที่ 1 ข้อมูลส่วนบุคคล

1. เพศ  ชาย  หญิง
2. สถานภาพการสมรส  โสด  แต่งงาน  หม้าย  หย่า  แยก
3. อายุ ปี .....
4. ระดับการศึกษา  ไม่ได้เรียน  ประถมศึกษา  มัธยมศึกษา  
 ปริญญาตรี  ปริญญาโท  สูงกว่าปริญญาโท
5. ศาสนา  พุทธ  อิสลาม  คริสต์  ศาสนาอื่น ๆ ระบุ.....
6. รายได้รวมของครอบครัวต่อเดือน  
 ต่ำกว่า 4,999 บาท  5,000-9,999 บาท  
 10,000-14,999 บาท  15,000-19,999 บาท  
 20,000-24,999 บาท  มากกว่า 25,000 บาท
7. น้ำหนัก .....กิโลกรัม
8. ส่วนสูง .....เซนติเมตร
9. ระยะเวลาที่ป่วยเป็นเบาหวาน..... ปี

10. ประวัติการเจ็บป่วยด้วยโรคเบาหวานชนิดที่สองของสมาชิกในครอบครัว  มี  ไม่มี

ถ้ามีโปรดระบุความเกี่ยวข้อง .....

11. โรคประจำตัวอื่น ๆ  ไม่มี  มี

หากมี โปรดทำเครื่องหมาย ✓ ในช่อง  (สามารถตอบได้มากกว่า 1 ตัวเลือก)

ไขมันในเลือดสูง  ความดันโลหิตสูง

โรคหัวใจ  โรคไต

โรคอื่น ๆ โปรดระบุ .....

12. ประเภทของการรักษาโรคเบาหวานที่ท่านได้รับ

ไม่ใช้ยา  ยารับประทาน

อินซูลิน  ใช้ทั้งอินซูลินและยารับประทาน

13. ประวัติการสูบบุหรี่  สูบ  เคยสูบ  ไม่สูบ

14. การดื่มเครื่องดื่มแอลกอฮอล์  ดื่ม  เคยดื่ม  ไม่ดื่ม

## ส่วนที่ 2 เครื่องมือที่ใช้ในการประเมินการรับรู้ความสามารถของตนเอง ,ความรู้และการจัดการตนเองในผู้ป่วยเบาหวานชนิดที่ 2

### แบบประเมิน การรับรู้ความสามารถของตนเองในผู้ป่วยเบาหวาน (T-DMSES)

คำชี้แจง โปรดวงกลมรอบตัวเลขที่ตรงกับระดับความรู้สึกของท่านมากที่สุด เมื่อ 1= มั่นใจระดับน้อยที่สุด และ 5 = มั่นใจระดับมากที่สุด

ฉันมั่นใจว่า :

1. ฉันสามารถตรวจวัดระดับน้ำตาลในเลือดของฉันได้ในกรณีที่จำเป็น  
1 2 3 4 5
2. ฉันสามารถลดระดับน้ำตาลในเลือดของฉันได้หากระดับน้ำตาลในเลือดของฉันสูงเกินไป เช่น เปลี่ยน)  
(ชนิดของอาหารที่รับประทาน)  
1 2 3 4 5
3. ฉันสามารถเพิ่มระดับน้ำตาลในเลือดของฉันได้หากระดับน้ำตาลในเลือดของฉันต่ำเกินไป เช่น เปลี่ยน)  
ชนิดของอาหารที่รับประทาน)  
1 2 3 4 5
4. ฉันสามารถเลือกรับประทานอาหารที่ดีและเป็นประโยชน์ต่อสุขภาพของฉัน  
1 2 3 4 5
5. ฉันสามารถเลือกอาหารที่หลากหลายโดยยังคงยึดตามแผนการรับประทานอาหารเพื่อสุขภาพ  
1 2 3 4 5
6. ฉันสามารถควบคุมน้ำหนักตัวและรักษาน้ำหนักตัวให้อยู่ในระดับที่เหมาะสมได้  
1 2 3 4 5
7. ฉันสามารถตรวจสอบเท้าของฉันได้ (เช่น ตรวจสอบว่าควรตัดเล็บเท้าหรือไม่ หรือมีบาดแผลหรือไม่)  
1 2 3 4 5
8. ฉันสามารถออกกำลังกายและทำกิจกรรมทางกายได้อย่างเพียงพอ เช่น การเดิน การเดินแอโรบิก และการ)  
(ยืดเหยียดกล้ามเนื้อ)  
1 2 3 4 5
9. ฉันยังคงสามารถรับประทานอาหารได้ตามแผนการรับประทานอาหารเมื่อฉันป่วย  
1 2 3 4 5
10. ฉันสามารถปฏิบัติตามแผนการรับประทานอาหารเพื่อสุขภาพอย่างสม่ำเสมอ  
1 2 3 4 5
11. ฉันสามารถออกกำลังกายเพิ่มขึ้นได้ หากแพทย์ให้คำแนะนำว่าควรที่จะทำเช่นนั้น  
1 2 3 4 5
12. เมื่อได้ออกกำลังกายเพิ่มขึ้น ฉันสามารถปรับเปลี่ยนแผนการรับประทานอาหารของตนเองได้  
1 2 3 4 5
- 13.ฉันสามารถปฏิบัติตามแผนการรับประทานอาหารเพื่อสุขภาพได้ เมื่อฉันไม่ได้อยู่ที่บ้าน  
1 2 3 4 5

14.ฉันสามารถเลือกรับประทานอาหารที่หลากหลาย โดยยึดตามแผนการรับประทานอาหาร เมื่อฉันไม่ได้อยู่ที่บ้าน

1 2 3 4 5

15.ฉันสามารถปฏิบัติตามแผนการรับประทานอาหารเพื่อสุขภาพในระหว่างช่วงที่มิงานเทศกาลต่างๆ ได้

1 2 3 4 5

16.ฉันสามารถเลือกอาหารที่หลากหลาย โดยยังคงยึดตามแผนการรับประทานอาหารเพื่อสุขภาพ เมื่อฉันต้องไปงานเลี้ยงสังสรรค์

1 2 3 4 5

17. ฉันสามารถยึดตามแผนการรับประทานอาหารของตนเอง เมื่อฉันกำลังรู้สึกเครียดหรือวิตกกังวล

1 2 3 4 5

18. ฉันสามารถไปพบแพทย์ได้ 4 ครั้งต่อ 1 ปี เพื่อทำการตรวจโรคเบาหวานของฉัน

1 2 3 4 5

19.ฉันสามารถรับประทานยาตามคำสั่งแพทย์ได้

1 2 3 4 5

20.ฉันจะสามารถรับประทานยาของฉันได้ตามปกติแม้เจ็บป่วย

1 2 3 4 5

## แบบประเมิน สาระสำคัญของกิจกรรมการดูแลตนเองในผู้ป่วยโรคเบาหวาน (T-SDSCA)

**คำชี้แจง** คำถามต่อไปนี้จะถามท่านเกี่ยวกับกิจกรรมการดูแลตนเองในผู้ป่วยโรคเบาหวาน ในระยะ 7 วันที่ผ่านมา หากท่านป่วยในช่วง 7 วันที่ผ่านมา โปรดนึกถึงกิจกรรมการดูแลตนเองในช่วง 7 วันก่อนที่ท่านจะป่วย(โปรดวงกลมรอบตัวเลขที่ตรงกับความจริงการปฏิบัติของท่าน)

### การรับประทานอาหาร

ในช่วง 7 วันที่ผ่านมา ท่านได้ปฏิบัติตามแผนการรับประทานอาหารเพื่อสุขภาพกี่วัน ?

0 1 2 3 4 5 6 7

โดยเฉลี่ยแล้ว ช่วงเดือนที่ผ่านมา ท่านได้ปฏิบัติตามแผนการรับประทานอาหารเพื่อสุขภาพกี่วันต่อสัปดาห์ ?

0 1 2 3 4 5 6 7

ในช่วง 7 วันที่ผ่านมา ท่านได้รับประทานผักและผลไม้เท่ากับหรือมากกว่า 5 ชนิด กี่วัน

0 1 2 3 4 5 6 7

ในช่วง 7 วันที่ผ่านมา ท่านได้รับประทานอาหารที่มีไขมันสูงเช่นเนื้อแดงหรือผลิตภัณฑ์นมที่มีไขมัน กี่วัน ?

0 1 2 3 4 5 6 7

### การออกกำลังกาย

ในช่วง 7 วันที่ผ่านมา ท่านได้ออกกำลังกายเป็นเวลาอย่างน้อย 30 นาที (รวมถึงการเดินออกกำลังกายอย่างต่อเนื่องเป็นจำนวนกี่วัน)

0 1 2 3 4 5 6 7

ในช่วง 7 วันที่ผ่านมา ท่านได้ออกกำลังกายในช่วงการออกกำลังกายที่เฉพาะเจาะจง เช่น เดินแอร์โรบิควิ่ง , ปั่นจักรยาน , เหยาะ ๆ ทยานนอกเหนือจากที่ทำบริเวณบ้านหรือที่ทำงาน เป็นจำนวนกี่วัน ?

0 1 2 3 4 5 6 7

### การตรวจระดับน้ำตาลในเลือด

ในช่วง 7 วันที่ผ่านมา ท่านได้ตรวจระดับน้ำตาลในเลือดกี่วัน ?

0 1 2 3 4 5 6 7

ในช่วง 7 วันที่ผ่านมา ท่านได้ตรวจระดับน้ำตาลในเลือด ตามคำแนะนำของบุคลากรทางด้านสุขภาพกี่วัน ?

0 1 2 3 4 5 6 7

### การดูแลเท้า

ในช่วง 7 วันที่ผ่านมา ท่านได้ตรวจเช็คเท้าของท่านกี่วัน

0 1 2 3 4 5 6 7

ในช่วง 7 วันที่ผ่านมา ท่านได้ตรวจเช็คด้านในรองเท้าของท่านกี่วัน

0 1 2 3 4 5 6 7

### การสูบบุหรี่

ท่านได้สูบบุหรี่ แม้แต่ครั้งเดียว (ซีดเดียว) ในช่วง 7 วันที่ผ่านมา

ไม่ใช่  ใช่

ถ้าตอบว่าใช่ โปรดระบุจำนวนมวนบุหรี่ที่ท่านสูบต่อวัน มวน .....

แพทย์ได้สั่งการรักษาใดบ้างต่อไปนี้แก่ท่าน ? โปรดระบุการรักษาทุกการรักษาที่ท่านได้รับ

- ก. ฉีดอินซูลิน 1-2 ครั้งต่อวัน
- ข. ฉีดอินซูลิน 3 ครั้งหรือมากกว่า 3 ครั้งต่อวัน
- ค. ยาเม็ดรับประทานเพื่อควบคุมระดับน้ำตาลในเลือด
- ง. การรักษาอื่น ๆ ..... (โปรดระบุ)
- จ. ฉันไม่ได้รับยาตามใบสั่งแพทย์ทั้งยาเม็ดรับประทานอินซูลิน

### การรับประทานอาหาร

ในช่วง 7 วันที่ผ่านมา ท่านได้งดเว้นอาหารจำพวกแป้งและน้ำตาลตลอดทั้งวัน กี่วัน

0 1 2 3 4 5 6 7

### การรับประทานยา

ในช่วง 7 วันที่ผ่านมา ท่านได้ทำตามคำแนะนำแพทย์เกี่ยวกับยาโรคเบาหวานกี่วัน

0 1 2 3 4 5 6 7

ในช่วง 7 วันที่ผ่านมา ท่านได้ยาฉีดอินซูลินตามคำแนะนำแพทย์นำกี่วัน

0 1 2 3 4 5 6 7

ในช่วง 7 วันที่ผ่านมา ท่านได้รับประทานยาเม็ดรักษาเบาหวานตามคำแนะนำแพทย์กี่วัน

0 1 2 3 4 5 6 7

### การดูแลเท้า

ในช่วง 7 วันที่ผ่านมา ท่านได้ล้างทำความสะอาดเท้ากี่วัน

0 1 2 3 4 5 6 7

ในช่วง 7 วันที่ผ่านมา ท่านได้เช็ดเท้าของท่านกี่วัน

0 1 2 3 4 5 6 7

ในช่วง 7 วันที่ผ่านมา ท่านได้ทำให้ชอกนิ้วเท้าแห้งหลังจากล้างทำความสะอาดเท้ากี่วัน ?

0 1 2 3 4 5 6 7

## แบบสอบถาม ความรู้เกี่ยวกับโรคเบาหวาน (DKQ)

**คำชี้แจง** ข้อคำถามต่อไปนี้ มีเพียงคำตอบที่ถูกเพียงข้อเดียวในแต่ละข้อคำถาม หากท่านทราบคำตอบ โปรดวงกลมรอบตัวอักษรหน้าคำตอบนั้น หากท่านไม่ทราบคำตอบ โปรดวงกลมรอบตัวอักษรหน้าตัวเลือก “ฉันไม่ทราบ”

- สาเหตุโดยทั่วไปของโรคเบาหวานชนิดที่ 2 คือ :
  - รับประทานน้ำตาลและอาหารที่หวานมากเกินไป
  - อินซูลินในร่างกายทำงานไม่มีประสิทธิภาพ
  - การทำงานของไตในการควบคุมน้ำตาลในปัสสาวะบกพร่อง
  - ฉันไม่ทราบ
- โรคเบาหวานที่ไม่ได้รับการรักษาโดยปกติจะทำให้ให้น้ำตาลในเลือด:
  - ปกติ
  - เพิ่มขึ้น
  - ลดลง
  - ฉันไม่ทราบ
- ช่วงของระดับน้ำตาลในเลือดที่ปกติคือ :
  - 2.8 มิลลิโมล/ลิตร
  - 6.1 มิลลิโมล/ลิตร
  - 7.0 มิลลิโมล/ลิตร
  - ฉันไม่ทราบ
- ปัญหาทางสุขภาพใดต่อไปนี้ ไม่ได้ เป็นภาวะแทรกซ้อนที่เกิดจากโรคเบาหวาน:
  - โรคไต
  - ปัญหาเกี่ยวกับตา
  - ปัญหาเกี่ยวกับปอด
  - ทุกข้อที่กล่าวมาข้างต้น
  - ฉันไม่ทราบ
- ข้อใดต่อไปนี้กล่าวถูกต้อง?
  - ไม่เป็นปัญหาหากฉันไม่สามารถควบคุมเบาหวานได้เต็มที่ ตราบใดที่ฉันยังไม่มีอาการโคม่า
  - เป็นเรื่องดีที่มีน้ำตาลปนกับปัสสาวะบ้างเพื่อเป็นการหลีกเลี่ยงภาวะน้ำตาลในเลือดต่ำ
  - การควบคุมเบาหวานที่ไม่ดีอาจเกิดภาวะแทรกซ้อนที่รุนแรงในภายหลัง
  - ฉันไม่ทราบ

6. หัวใจสำคัญของการควบคุมเบาหวานคือ :

- ก. ความสมดุลระหว่างปริมาณอินซูลิน ยาเม็ดควบคุมน้ำตาล อาหาร และการออกกำลังกาย
- ข. การรักษาระดับน้ำตาลในปัสสาวะให้ต่ำเพื่อป้องกันการเกิดภาวะน้ำตาลในเลือดต่ำ
- ค. การรับประทานอาหาร โปรตีนสูงและมีกากใยสูง
- ง. ฉีดยาไม่ทราบ

7. ผู้ที่เป็นเบาหวานควรที่จะ :

- ก. ปรุงอาหารแยกจากสมาชิกคนอื่น ๆ ในครอบครัว
- ข. รับประทานอาหารเช้าในเวลาเดิมทุก ๆ วัน
- ค. รับประทานอาหารที่หลากหลาย สับเปลี่ยนรายการอาหารทุกวัน
- ง. ฉีดยาไม่ทราบ

8. โดยทั่วไปแล้ว ผู้ป่วยเบาหวานที่ร่างกายสมบูรณ์แข็งแรง ควรออกกำลังกาย :

- ก. ครั้งละ 1 ชั่วโมง สัปดาห์ละครั้ง
- ข. ครั้งละ 20 -30 นาที 3-5 ครั้งต่อสัปดาห์
- ค. 1 ชั่วโมง ทุก ๆ วัน
- ง. ฉีดยาไม่ทราบ

9. โดยทั่วไปการออกกำลังกายมีผลต่อการ :

- ก. ลดระดับน้ำตาลในเลือด
- ข. เพิ่มระดับน้ำตาลในเลือด
- ค. เพิ่มน้ำตาลในปัสสาวะ
- ง. ฉีดยาไม่ทราบ

10. ข้าวส่วนใหญ่เป็น :

- ก. โปรตีน
- ข. คาร์โบไฮเดรต
- ค. ไขมัน
- ง. ฉีดยาไม่ทราบ

11. อาหารใดต่อไปนี้ที่ท่านสามารถรับประทานได้มากที่สุดเท่าที่ท่านอยากจะรับประทาน ?

- ก. แอปเปิล
- ข. คีนฉ่าย, ผักชี
- ค. เนื้อสัตว์
- ง. ฉีดยาไม่ทราบ



12. การตรวจสอบระดับน้ำตาลในเลือดด้วยตนเอง คือ :
- ก. หัวใจสำคัญในการกำหนดปริมาณที่เหมาะสมของยา
  - ข. สิ่งสำคัญเพื่อผลลัพธ์ของการควบคุมโรคเบาหวานเช่น การรับประทานอาหารและการออกกำลังกาย
  - ค. ถูกทั้ง ก. และ ข .
  - ง. ฉันไม่ทราบ
13. ผู้ป่วยโรคเบาหวานควรที่จะดูแลเท้าของตนเองให้ดี เนื่องจาก :
- ก. การได้รับยาฉีดอินซูลินที่ขาเป็นเวลานานๆ อาจทำให้เท้าบวมได้
  - ข. โดยทั่วไปแล้วเท้าที่มีลักษณะแบนมีความเกี่ยวข้องกับโรคเบาหวาน
  - ค. ผู้สูงอายุที่ป่วยเป็นเบาหวานอาจมีการไหลเวียนของเลือดบริเวณเท้าไม่ดี
  - ง. ฉันไม่ทราบ
14. ฤทธิ์ของยาเมื่อรับประทานรักษาเบาหวานคือ
- ก. ทำให้ระดับน้ำตาลในเลือดลดลง
  - ข. เพิ่มการหลั่งของอินซูลิน
  - ค. เพิ่มการตอบสนองของอินซูลิน
  - ง. ถูกทุกข้อที่กล่าวมา
  - จ. ฉันไม่ทราบ

## ผลการตรวจทางห้องปฏิบัติการและภาวะแทรกซ้อน

1. HbA1C ผลการตรวจ .....mg/dl  
วันที่ตรวจ วัน/เดือน/ปี (...../...../.....)
2. LDL –cholesterol ผลการตรวจ.....mg/dl  
วันที่ตรวจ วัน/เดือน/ปี (...../...../.....)
3. HDL-cholesterol ผลการตรวจ .....mg/dl  
วันที่ตรวจ วัน/เดือน/ปี (...../...../.....)
4. Triglyceride ผลการตรวจ .....mg/dl  
วันที่ตรวจ วัน/เดือน/ปี (...../...../.....)

## 5. ความดันโลหิต

5a. SBP..... mmHg

5b. DBP..... mmHg

วันที่ตรวจ วัน/เดือน/ปี (...../...../.....)

6. ภาวะแทรกซ้อนเรื้อรัง  ไม่มี  มีหากตอบว่ามี โปรดทำเครื่องหมาย ✓ ในช่อง  ตอบได้มากกว่า 1 ตัวเลือก

- Cerebrovascular Accident; CVA
- Cerebral Infraction
- Ischemic Stroke
- Stroke, Not specify
- Cerebral Hemorrhage
- Transient Ischemic Attack; TIA
- Angina pectoris
- Congestive Heart Failure; CHF
- Myocardial Infraction; MI included Ischemic Heart Disease; IHD
- Coronary Revascularization
- Peripheral Arterial Disease, PAD
- Neuropathy (Painful neuropathy, Autonomic neuropathy, neurogenic bladder)
- Renal Insufficiency (CRI, CRF, CKD, ESRD)
- Diabetes Nephropathy; DN
- Diabetes Retinopathy; DR
- ภาวะแทรกซ้อนอื่น ๆ โปรดระบุ.....
